# Supplementary material
Source: PubMed Central journal article supplement (PMC5710325)
Supplement: jamaneurol-74-941-s002.pdf [file jamaneurol-74-941-s002.pdf]

## Supplementary Online Content

Pahwa R, Tanner CM, Hauser RA, et al. ADS-5102 (amantadine) extended-release capsules for levodopa-induced dyskinesia in Parkinson disease (EASE LID Study): a randomized clinical trial. *JAMA Neurol*. Published online June 12, 2017. doi:10.1001/jamaneurol.2017.0943

**eFigure 1.** Change in UDysRS Total Score—Subgroups at Week 12 (mITT Population)

**eFigure 2.** Synchronized Time Profiles of Patient-Reported Diary States at 12 Weeks

**eFigure 3.** Synchronized Time Profiles of Patient-Reported Diary States at 24 Weeks

**eTable.** Summary of Most Common Adverse Events by Time to Onset

This supplementary material has been provided by the authors to give readers additional information about their work.

**eFigure 1. Change in UDysRS Total Score—Subgroups at Week 12 (mITT Population)**

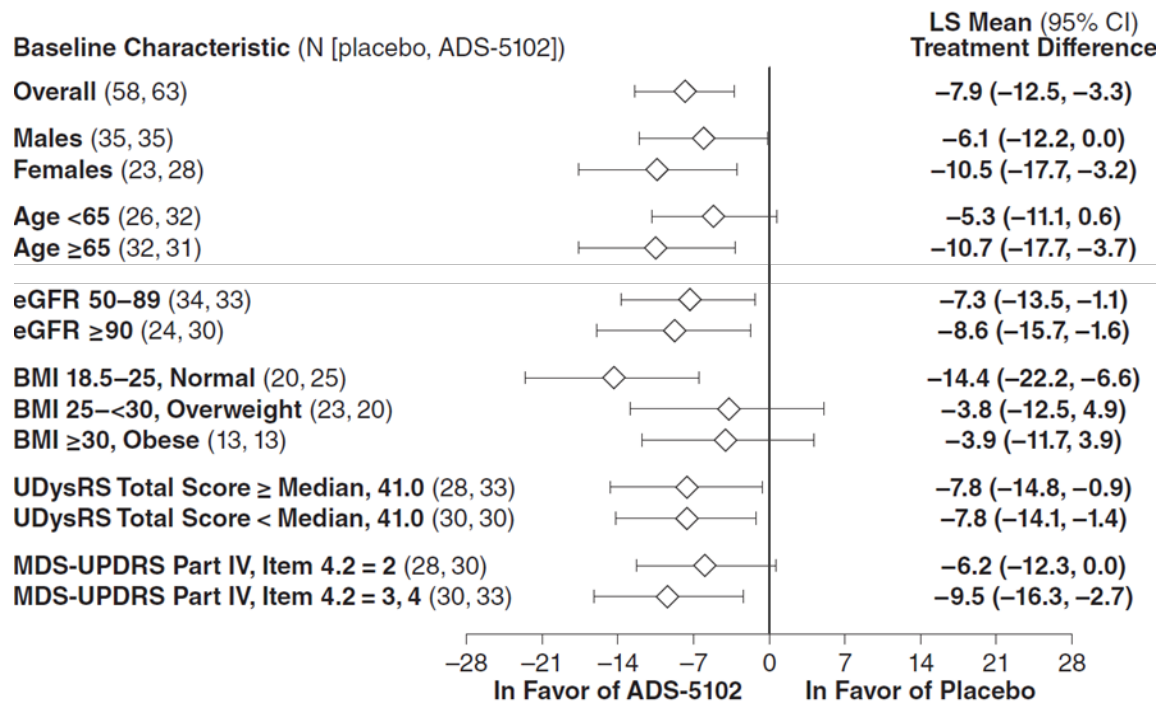

BMI, body mass index; CI, confidence interval; eGFR, estimated glomerular filtration rate; LS, least squares; MDS-UPDRS, Movement Disorder Society–Unified Parkinson’s Disease Rating Scale; mITT, modified intent-to-treat; UDysRS, Unified Dyskinesia Rating Scale.

**eFigure 2. Synchronized Time Profiles of Patient-Reported Diary States at 12 Weeks**

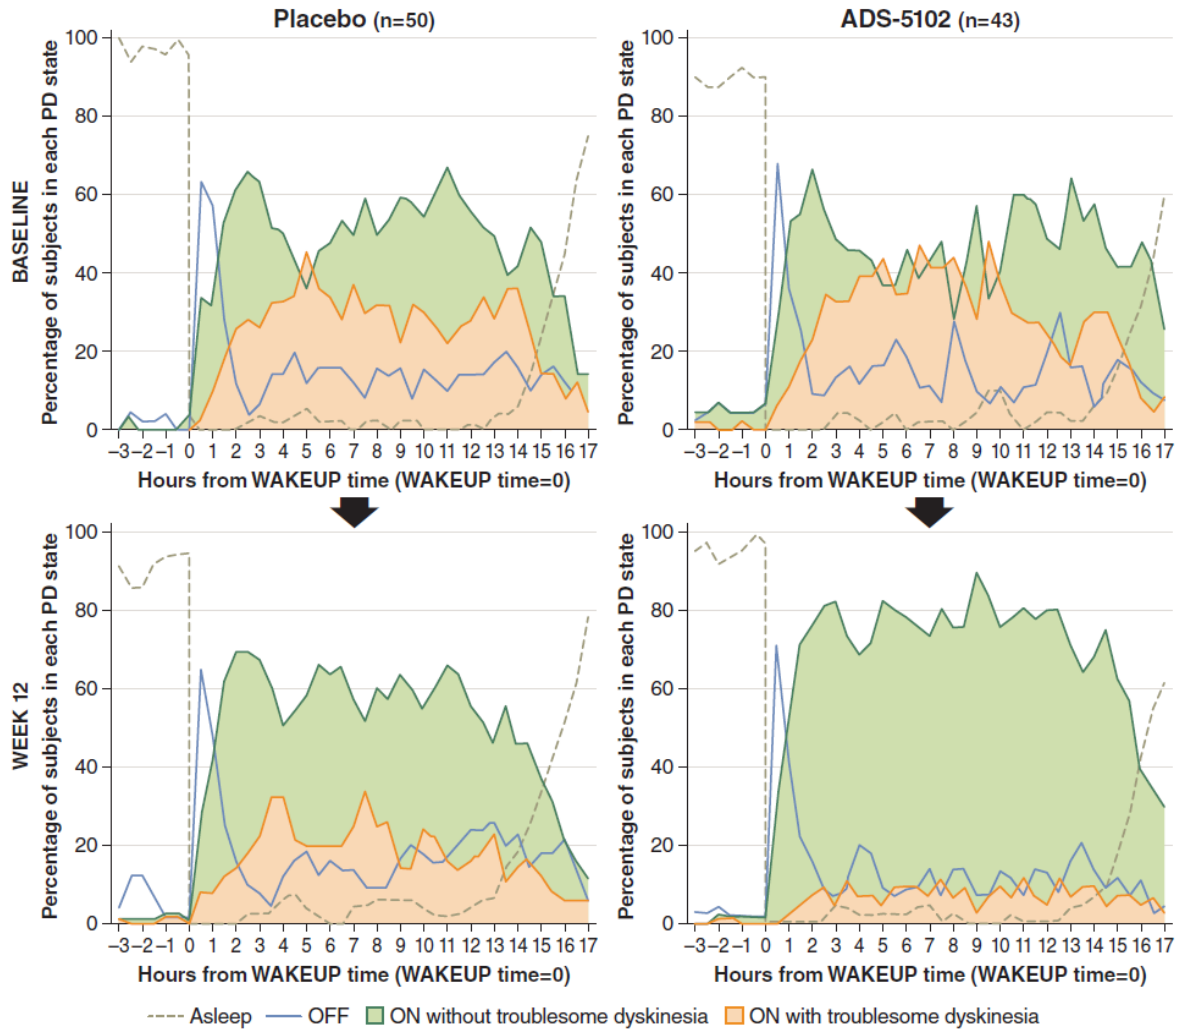

For each patient, 12-week PD diary data were evaluated and a patient-specific WAKEUP time was identified. WAKEUP time was defined as the beginning of the first 4 consecutive diary entries after 3:00 AM that did not contain a single “ASLEEP” entry. Patient diary times were adjusted to align each patient’s data to WAKEUP ( $t = 0$ ), and the percentages of patients in each diary state were plotted for the next 17 hours for the placebo and ADS-5102 groups (bottom row). For comparison, an identical analysis was performed using the baseline period PD diary data (top row). PD, Parkinson’s disease.

**eFigure 3. Synchronized Time Profiles of Patient-Reported Diary States at 24 Weeks**

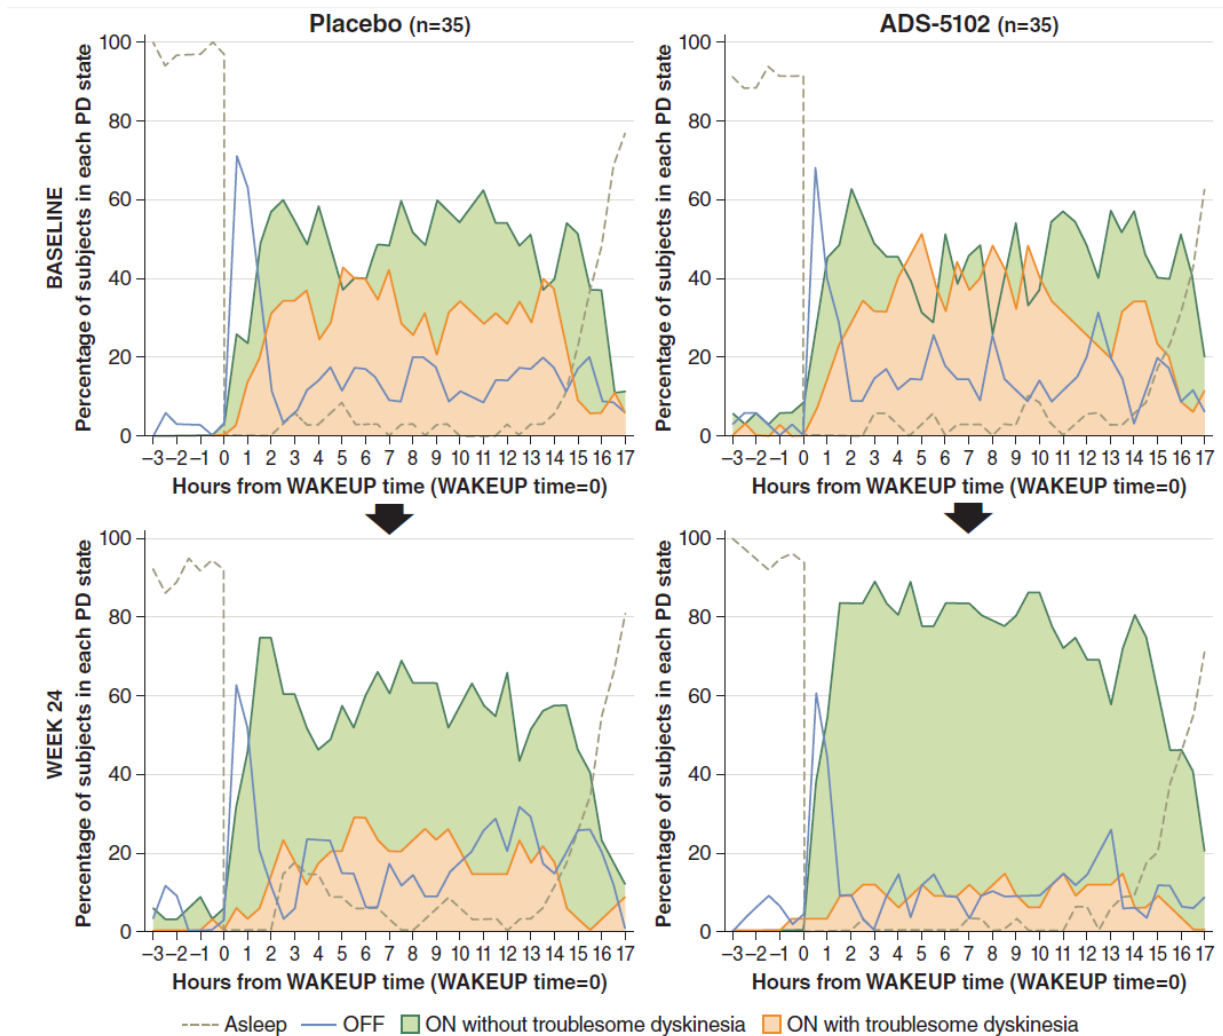

For each patient, 24-week PD diary data were evaluated and a patient-specific WAKEUP time was identified. WAKEUP time was defined as the beginning of the first 4 consecutive diary entries after 3:00 AM that did not contain a single “ASLEEP” entry. Patient diary times were adjusted to align each patient’s data to WAKEUP (t = 0) and the percentages of patients in each diary state were plotted for the next 17 hours for the placebo and ADS-5102 groups (bottom row). For comparison, an identical analysis was performed using the baseline period PD diary data (top row). PD, Parkinson’s disease.

**eTable. Summary of Most Common Adverse Events by Time to Onset**

| Preferred Term          | Baseline to Week 13 |                    | Week 13 to Week 25 <sup>a</sup> |                    |
|-------------------------|---------------------|--------------------|---------------------------------|--------------------|
|                         | Placebo<br>(n=60)   | ADS-5102<br>(n=63) | Placebo<br>(n=51)               | ADS-5102<br>(n=53) |
| Visual hallucinations   | 1 (1.7)             | 12 (19.0)          | 0                               | 3 (5.7)            |
| Peripheral edema        | 0                   | 12 (19.0)          | 0                               | 3 (5.7)            |
| Dizziness               | 0                   | 12 (19.0)          | 0                               | 2 (3.8)            |
| Dry mouth               | 0                   | 11 (17.5)          | 0                               | 0                  |
| Constipation            | 3 (5.0)             | 9 (14.3)           | 0                               | 1 (1.9)            |
| Fall                    | 5 (8.3)             | 7 (11.1)           | 0                               | 3 (5.7)            |
| Anxiety                 | 1 (1.7)             | 5 (7.9)            | 0                               | 1 (1.9)            |
| Livedo reticularis      | 0                   | 4 (6.3)            | 0                               | 2 (3.8)            |
| Auditory hallucinations | 0                   | 4 (6.3)            | 0                               | 1 (1.9)            |
| Abnormal dreams         | 1 (1.7)             | 3 (4.8)            | 1 (2.0)                         | 1 (1.9)            |
| Depression              | 1 (1.7)             | 1 (1.6)            | 0                               | 3 (5.7)            |

Data are n (%). <sup>a</sup>Denominators are the number of patients on study beyond 13 weeks of treatment.
